# Supplementary material
Source: publisher site journal article supplement (https://www.dovepress.com/get_supplementary_file.php?f=457845.xlsx)
Supplement: Supplementary file 1 [file get_supplementary_file.php]

## Sheet: Table S1
Table S1 Baseline characteristics of BM population
Characteristics	No. (N = 47)	%
Age
median (range)	50	30-70
<60	38	80.9
≥60	9	19.1
Menstrual status
Pre-menopausal	23	48.9
Post-menopausal	24	51.1
ECOG
0-1	43	91.5
2	4	8.5
HR
Negative	23	48.9
Positive	24	51.1
HER2
2+ & ISH +	8	17
3+	39	83
Ki-67
<20%	2	4.3
≥20%	45	95.7
Timing of brain metastases
Synchronously with primary lesion	6	12.8
Metachronously with primary lesion	41	87.2
Other metastatic sites
None	12	25.5
Lymph nodes	19	40.4
Lung	15	31.9
Liver	9	19.1
Bone	21	44.7
Location of BM
Cerebrum	39	83
Cerebellum	27	57.4
Brain stem	3	6.4
Leptomeninges	3	6.4
Metastatses number
≤3	32	68.1
>3	15	31.9
The diameter of Maximum BM lesions
<1cm	15	31.9
≥1&<3cm	23	48.9
≥3cm	9	19.1
Previous anti-HER2 treatment
None	6	12.8
Trastuzumab	41	87.2
Pertuzumab	11	23.4
Lapatinib	2	4.3
Abbreviation: BM, brain metastases; ECOG, Eastern Cooperative Oncology Group; HR, hormone receptor; HER2, human epidermal growth factor receptor 2; ISH, in situ hybridization; TDM-1, ado-trastuzumab emtansine.

## Sheet: Table S2
Table S2 Treatment administration in BM subgroup
Combined treatment	Combined anti-HER2 regimens with Pyrotinib			Total, n(%)
	None	Trastuzumab	Inetetamab
Combined chemotherapeutics
None	3	3	1	7(14.9)
Capecitabine	21	4	3	28(59.6)
Vinorelbine	1	0	0	1(2.1)
Paclitaxel	2	6	0	7(14.9)
Eribulin	1	1	0	2(4.3)
Other	1	1	0	2(4.3)
Total, n(%)	29(61.7)	14(29.8)	4(8.5)	47(100.0)
Combined local treatment
None	12	7	2	21(44.7)
Radiotherapy	10	4	0	14(29.8)
SRS/SRT	8	4	0	12(25.5)
WBRT	2	0	0	2(4.3)
Neurosurgery	6	3	2	11(23.4)
Unknown	1	0	0	1(2.1)
Abbreviation: HER2, human epidermal growth factor receptor 2; SRS, stereotactic radiosurgery; SRT, stereotactic radiotherapy; WBRT, whole brain radiation therapy.
